1

2

## 3 Facial expressions of emotional stress in horses

4

5

6 Johan Lundblad<sup>1\*</sup>, Maheen Rashid<sup>2</sup>, Marie Rhodin<sup>1</sup>, Pia Haubro Andersen<sup>3</sup>

7

8

9 <sup>1</sup> Department of Anatomy, Physiology and Biochemistry, Swedish University of Agricultural  
10 Sciences, Uppsala, Sweden

11

12 <sup>2</sup> Department of Computer Science, University of California, Davis, California, USA

13

14 <sup>3</sup> Department of Clinical Sciences, Swedish University of Agricultural Sciences, Uppsala,  
15 Sweden

16

17

18 \* Corresponding author

19 E-mail: [Johan.Lundblad@slu.se](mailto:Johan.Lundblad@slu.se) (JL)

20

## 21 **Abstract**

22 Horses have the ability to generate a remarkable repertoire of facial expressions, some which  
23 have been linked to certain emotional states, for example pain. Studies suggest that facial  
24 expressions may be a more ‘honest’ expression of emotional state in horses than behavioral  
25 or physiological parameters. This study sought to describe the facial expressions during stress  
26 of healthy horses free of pain, using a standardized method of recording facial expressions in  
27 video. Stress was induced in 28 horses by subjecting them to road transport and 10 of these  
28 horses were also subjected to social isolation. The horses served as their own control. A  
29 body-mounted, remote controlled heart rate monitor provided continuous heart rate  
30 measurements during the interventions. The horses’ facial expressions were video-recorded  
31 during the interventions. Frequency and duration of each facial expression were then  
32 determined, according to the Equine Facial Action Coding System. Heart rate increased  
33 during the stressful interventions ( $p=0.01$ ), confirming that the interventions were stressful.  
34 Using both the human investigation- and the co-occurrence methods, the following facial  
35 traits could be observed during stress: *eye white increase* ( $p<0.001$ ), *nostril dilator* ( $p<0.001$ ),  
36 *upper eyelid raiser* ( $p<0.001$ ), *inner brow raiser* ( $p=0.042$ ), *tongue show* ( $p<0.001$ ) along  
37 with an increase in ‘ear flicker’ ( $p<0.001$ ) and blink frequency ( $p<0.001$ ). The facial actions  
38 were successfully used to train a machine-learning classifier to discriminate between stressed  
39 and calm horses, with an accuracy of 74.2 %. Most of the facial features identified  
40 correspond well with previous research on the subject, for example flared nostrils, repetitive  
41 mouth behaviors, increased eye white, tongue show and ear movements. Some features  
42 selected as indicative of emotional pain-free stress are used in face-based pain assessment  
43 tools, such as dilated nostrils, eye white increase or inner brow raiser. The relation between  
44 facial expressions of stress and pain should therefore further be studied.

## 45 **Introduction**

46 Lack of a ‘gold standard’ for evaluating emotional states in non-verbal mammals has been a  
47 driving force for exploration of bodily behavior or physiological markers to convey  
48 information about internal states [1]. Facial activity can generate a wide array of different  
49 observable expressions [2] and has been suggested as a tool for assessment of welfare in  
50 mammals [1]. Many facial expressions are conserved across mammal species, including  
51 humans [3]. In humans, who can self-report, it is known that the affective component of pain  
52 is expressed by prototypical facial expressions [4]. The human emotional states happiness, fear,  
53 anger and disgust are also associated with typical facial expressions [5]. Horses have the ability  
54 to generate a remarkable repertoire of facial expressions, which can be described by 17 action  
55 units [6]. This is smaller than the human repertoire [7], but larger than that of e.g., chimpanzees  
56 or dogs [8,9]. Recently, it has been shown that horses can display facial changes which are  
57 specific to pain [10–12]. The facial actions involved include features such as eyebrow raising  
58 or tightening of eyelids, ears back, tension of the lower face muscles, and widened nostrils.  
59 Current pain assessment tools use these traits [10–12], but with some differences in the  
60 descriptions of facial configurations.

61

62 One limitation to using facial cues for pain assessment in horses is that the specificity in relation  
63 to other common affective states, e.g., emotional stress, is not known [13]. Stress induces  
64 typical facial expressions in humans [14], but only a few studies of facial expressions during  
65 stress have been performed in horses, most focusing on features around the eye [15] or blinking  
66 frequency to determine stress. However, there is some controversy on whether the frequency  
67 of blinks increases [16] or diminishes [17] during stress. Pain is an internal stressor and the  
68 experience of pain may therefore elicit a stress response. In contrast, a stress response does not

69 infer pain. From human research, it is known that emotional state in individuals affects their  
70 perception of pain [5]. These complex interactions between stress and pain are currently  
71 unresolved in horses and other animals [6].

72

73 Stress is an adaptive physiological and emotional response that enables coping with challenges  
74 from the environment, such as tissue damage, or perceived threats of injury. In horses, which  
75 are prey animals, a multitude of emotional challenges may be present during both ordinary and  
76 extraordinary situations. These situations may include competitions, transportation by road,  
77 separation from the herd, social isolation during transportation, introduction to a new  
78 environment, and exposure to confinement during diagnostic procedures and treatment at an  
79 equine hospital. Most of these handling procedures have been shown to induce emotional stress  
80 [18–20], in addition to the stress inevitably induced by any pain the horse may feel at the  
81 moment.

82

83 The stress response may clinically appear as elevated heart and respiratory rate, increased blood  
84 pressure, and temperature [21]. It may even induce some degree of analgesia [22] or  
85 hyperalgesia [23], at least experimentally. These responses occur together with a number of  
86 behavioral changes, such as alertness or aversiveness (short-term) and stereotypies or apathy  
87 (long-term) in horses [21]. Some stress-related physiological changes are not specific to  
88 emotional stress, however. Cortisol release has a diurnal variation [24] and may be affected by  
89 pathologies [25]. Heart rate and blood pressure may be elevated in response to both positive  
90 and negative experiences, such as exercise [26], or during experience of an internal stressor,  
91 such as pain [25]. This renders physiological markers suitable for measurements of emotional  
92 stress in controlled settings, but not in the field, where discrimination between stress and pain

93 is important in clinical decision making. It is therefore of interest to investigate whether the  
94 rich facial repertoire of horses contains distinct facial expressions of emotional stress.

95

96 The Equine Facial Action Coding System (EquiFACS) [6] is a tool for recording facial  
97 expressions by observing onset and offset of anatomically based action units (AUs) and action  
98 descriptors (ADs) over time. The method does not infer anything about the meaning of the  
99 observed facial movements, leaving less space for subjective judgment. The resulting dataset  
100 contains data on the occurrence of different action units, time of onset, offset, and duration,  
101 and their temporal overlap with other active action units. EquiFACS was used to determine  
102 facial expressions of pain only recently [27]. To determine actions that are typical for pain in  
103 humans, a method based on increased frequencies is commonly used [28]. However, statistical  
104 methods for analyzing FACS data on horses are not yet well-developed, and data-driven  
105 methods for classification of emotional state in horses based on the frequency and duration of  
106 action units are generally lacking.

107

108 The aim of this study was therefore to describe, using EquiFACS, the facial expressions during  
109 controlled stressful events in healthy horses free of pain. Based on earlier descriptions, we  
110 expected to identify facial action patterns that were distinct to stress, with the most prominent  
111 being changes in repetitive mouth behaviors, flared nostrils, flattened ears [29], and the action  
112 descriptors yawning and tongue show [30]. We also expected an increased number of action  
113 units in response to visual or auditory inputs, displayed as increased frequencies of ear  
114 movement and eye blinks. To our knowledge, facial expressions of emotional stress have not  
115 been described previously using EquiFACS.

116

117 Short-term emotional stress was induced by transporting healthy horses in a trailer or keeping  
118 them in short-term social isolation. The physiological parameter heart rate was used as a marker  
119 of induced stress. We hypothesized that the frequency methods applied in human research can  
120 also identify important action units and action descriptors in horses, but also that methods using  
121 temporal distribution are accurate in classification of stress in horses.

## 122 **Materials and methods**

### 123 **Ethical statement**

124 This study was approved by the Ethics Committee for Animal Experiments, “Blinded for  
125 review” (Approval no. 5.8.18-10767/2019). Owner consent for use of privately owned horses  
126 was obtained before experimentation.

### 127 **Study design**

128 For this observational study, two standard horse management practices were used to induce  
129 emotional stress: short-term transportation and short-term isolation. Video footage was  
130 recorded during the stressful events, and when the horse was calm before or after the  
131 intervention. A body-mounted, remote-controlled heart rate monitor provided continuous heart  
132 rate measurements in all three situations.

### 133 **Horses**

134 A total of 28 university-owned and privately-owned horses were used in the study. Nine  
135 Standardbred trotters (seven mares and two geldings), and one warmblood mare from the  
136 university herd (UNI) were included. They were considered healthy at routine examinations  
137 during the previous four months, were of median age 12 years (range 8-19 years), and had

138 roughly the same body weight. They were kept at an authorized research facility at “Blinded  
139 for Review”. These horses were fed hay four times a day, and oats once a day according to a  
140 nutritional plan that supported normal condition. All horses were allowed out on pasture for 6  
141 hours a day and otherwise kept in individual 3 m x 4 m boxes. During the experiment, horses  
142 were moved to other boxes in the same facility and acclimatized for at least 16 hours. Horses  
143 were moved together in pairs, stabled besides each other, and kept in their regular stable herd  
144 (together for at least the previous 6 months). Each pair of horses had the same feeding and  
145 housing routine and had the same caretakers in all stables.

146

147 Eighteen privately owned horses (PRI) were included. They comprised 10 geldings, seven  
148 mares and one stallion, of the breeds Thoroughbreds (n=5), mixed-breed ponies (n=4),  
149 Standardbred trotters (n=3), and Swedish warmblood/riding breeds (n=6), with body weight  
150 ranging between approximately 400 and 600 kg. The median age of horses in this group was  
151 10 years (range 3-24 years). They were considered healthy by their caretakers, had not been  
152 subjected to veterinary treatment for the previous two months, and had not been treated with  
153 analgesics during that period. The horses were managed at home, by the horse owner, in the  
154 routines to which they were accustomed. All were kept in stables except for the thoroughbreds,  
155 which were kept in a free-range system. Three of the PRI horses were kept at the university but  
156 were treated as though they were privately owned.

157

158 All horses from PRI (N=18) and UNI (N=10) were subject to transportation (N=28). The PRI  
159 horses were studied in their own stable and were transported in their own trailer. The UNI  
160 horses were transported in a standard horse trailer for 20 minutes. All horses from UNI were

161 subjected to social isolation on a subsequent occasion (N=10). Social isolation was performed  
162 by leaving the horse alone in the stable without its herd mates for at least 15 minutes.

## 163 **Video-recording**

164 Video-recordings of the horses were made during the two types of stress and during baseline  
165 without the presence of an observer. In the PRI group and during transportation in the UNI  
166 group, video-recordings were made in the box and inside the horse trailer, using GoPro Hero  
167 3+ Silver Edition and GoPro Hero 7 Black cameras (GoPro Inc., San Mateo, California, USA).  
168 Resolution was set to 1080p at 30 fps and videos were exported to mp4-format. The cameras  
169 were mounted depending on the layout of the box, so that the entire horse and its box could be  
170 seen in the footage. If the stable had no regular box, the horses were filmed in their grooming  
171 spot. In the trailer, the halter of the horse was tied to a front bar in a standard manner, and the  
172 camera was mounted in line with the horses' head height and angled approximately 45-60  
173 degrees from the horses' medial plane. The cameras recorded for 10 to 20 minutes during  
174 transportation, and for at least 30 minutes during baseline.

175

176 During the social isolation intervention and the baseline (UNI), the horses were filmed in their  
177 own boxes. The video-recordings during social isolation were made using two wall-mounted  
178 standard surveillance cameras with night vision (WDR EXIR Turret Network Camera,  
179 HIKVISION, Hangzhou, China). Extra light was provided with nine standard fluorescent lights  
180 mounted in the ceiling, programmed to provide light during daytime hours. The cameras were  
181 mounted in each corner in the front of the box so only the horse and its box could be seen in  
182 the footage, in order to ensure blinding. Resolution was set to maximum and images were  
183 exported to mp4-format. The cameras recorded all baseline sessions for a minimum of 30  
184 minutes and social isolation sessions for a minimum of 15 minutes.



## 185 **Heart rate monitoring**

186 A remotely controlled human sport ECG transmitter (Polar Wearlink, Polar Electro OY,  
187 Kempele, Finland), modified for equine use, was used together with its corresponding control  
188 unit to obtain continuous heart rate measurements without the interference of an observer. The  
189 Wearlink device was fastened using a girth, which was soaked in water before attachment. The  
190 horses were allowed to adjust to the ECG transmitter for 10 minutes before measurements  
191 began [31]. The heart rate monitor was synchronized with the cameras, using a gesture in the  
192 video when the transmitter was started or using the time-stamped files produced by the cameras  
193 and heart rate transmitter. Files containing R-R intervals were exported and filtered through  
194 Polar ProTrainer Equine Edition (Polar Electro OY, Kempele, Finland). The files were  
195 processed in Kubios HRV Premium (Kubios, Finland) in order to extract heart rate during the  
196 selected time intervals. Heart rate measurements were extracted as a mean during five minutes,  
197 with onset two minutes and 15 seconds before annotation started. A two-way paired t-test for  
198 means was used to calculate significance in the PRI group. In the UNI group, ANOVA was  
199 used to test for significance between all three interventions and a two-way paired t-test for  
200 means was used to test for the specific rise in heart rate between the baseline and the respective  
201 intervention.

## 202 **Video processing and annotation**

203 The identity of the video-recordings of the transportation group could only be blinded for horse,  
204 and not for intervention, since the location in the trailer and its movements could not be hidden.  
205 Selection of clips was made by manual inspection and 30-second clips of suitable footage were  
206 cut from the videos. If the face was visible and scorable for more than 30 seconds, a random  
207 number generator was used for video selection.

208

209 The identity of the video-recordings of the social isolation group was blinded in relation to  
210 horse and intervention before annotation. Selection of videos for the social isolation group was  
211 performed using an automated face detection system [32], where sequences were selected if  
212 the head position of the horse was suited for annotation. Thirty-second sequences of video with  
213 a side- or front- view confidence of at least 60% were selected. If several selections were  
214 available, a random number generator was used to select one clip. The selected clips were  
215 manually inspected to ensure that the software had successfully identified a face. If not, a new  
216 clip was randomly selected.

217

218 All films were annotated in a blinded manner by two EquiFACS-certified veterinarians with a  
219 minimum of 70% correct annotations compared with expert raters. All transportation and  
220 baseline films were also annotated by JL who is also certified in EquiFACS. Annotation was  
221 performed using a template consisting of all codes in EquiFACS, including supplemental codes  
222 and the visibility code VC74 (code for unscorable), but without head movements (AD51-  
223 AD55). Annotation was performed with the open-source program ELAN [33]. The annotators  
224 coded the onset and offset of the facial action units, allowing calculation of frequency and  
225 duration, i.e., how frequently an action unit or action descriptor occurred and how long it  
226 remained active. The annotators set the onset of the action unit to when the muscle started  
227 contraction and the offset to when it was fully back to neutral again. Inter-rater agreement  
228 between the coders was calculated using the Wexler ratio as described by Ekman et al. [7],  
229 using a full 30-second clip as the sample. Inter-rater agreement was calculated to be on average  
230 0.75 (coder 1-2: 0.76; coder 2-3: 0.76; coder 1-3: 0.71), indicating good agreement between  
231 raters.

## 232 **Selection of EquiFACS codes in stressed horses**

233 Since inter-rater agreement was good, one set of annotations was randomly selected and used  
234 for each video. For each selected action unit or action descriptor, frequency and duration were  
235 observed. Frequency of ear flicker movements was also investigated. In order to do this, a  
236 movement index was created, by describing *ears forward* (EAD101) and *ear rotator* (EAD104)  
237 occurring together within a one-second interval. It is important to note that this is not an action  
238 descriptor but a definition of an occurrence, where the selected action descriptors occur in  
239 succession to constitute the “ear flicker”.

240

241 EquiFACS codes were analyzed using the method described by Kunz et al. [28], here called  
242 the Human FACS Investigation (HFI) method. Action units that accounted for more than 5%  
243 of total action unit occurrences in stress videos were selected. From this subset, action units  
244 detected at higher frequency in stress videos than in no-stress videos were selected as the final  
245 set of stress action units. While the HFI action unit selection method ensures that selected codes  
246 are frequent and distinct, they may have only a slightly stronger correlation with the emotional  
247 state and can exclude less frequent, but highly discriminative, action units. Therefore, the  
248 relative temporal distribution of action units was also considered. In order to do this, the method  
249 of Rashid et al. [27], here referred to as the Co-occurrence method, was used to calculate the  
250 co-occurrence of action units. This method selected EquiFACS codes that occurred together  
251 with other EquiFACS codes more frequently in stress than in no-stress states. Since onset and  
252 offset of EquiFACS codes were recorded in ELAN, codes which appeared simultaneously or  
253 in close relation to each other could be further studied. EquiFACS codes that occurred within  
254 a predetermined period (observation window size, OWS) were recorded as co-occurring.  
255 Action units that exhibited the largest difference in co-occurrence patterns between stress and  
256 no-stress states were selected. The method uses directed graphs to record and calculate

257 differences in co-occurrence patterns. Furthermore, a paired t-test for mean values was used to  
258 test significance, with  $p < 0.05$  considered significant.

259

260 For both the HFI and Co-occurrence methods, occurrences of *ears forward* (EAD101) and *ear*  
261 *rotator* (EAD104) that were included in the “ear flicker” category were not double counted for  
262 EAD101 and EAD104 separately. As a result, occurrence counts of EAD101 and EAD104 did  
263 not occur within a one-second interval of one another.

## 264 **Classification of stress/no stress**

265 The EquiFACS codes selected by the HFI and Co-Occurrence methods were used to train a  
266 machine learning classifier, Linear Support Vector Machine (LSVM), for stress versus no-  
267 stress classification. Twenty-five baseline videos and 35 stress videos (10 from social isolation,  
268 25 from transportation) were used. The frequency and duration features in the clips were used  
269 to represent each video sequence, in order to train the LSVM for stress versus no-stress  
270 classification. Using five-fold cross-validation, the optimum regularization parameter  $C$  and  
271 balanced class weights were selected. The Python Scikit-Learn library [34] and the Leave-One-  
272 Out (LOO) protocol were used to train and test the models, meaning that the features of all  
273 videos except one were used to train an LSVM that then used the same features on the  
274 remaining video to determine whether it showed a stress state. The LSVM predictions were  
275 collated across the entire dataset, and precision, recall, and accuracy were computed. The  
276 performance of the LSVM models indicated how well the selected EquiFACS codes captured  
277 the facial expressions of stress and acted as a type of construct validity to classify stress.

## 278 **Results**

### 279 **Heart rate during interventions**

280 The heart rate during interventions is shown in Fig 1. Heart rate increased from a pooled mean  
281 of 41 bpm (SD 10.6) during baseline to 70 bpm (SD 24.3) during transportation and to 55 bpm  
282 (SD 21.9) during social isolation. The increase in both groups was significant ( $p < 0.01$ ). In  
283 general, the spread of samples in the transportation group indicated that these measurements  
284 were somewhat more disrupted, due to more movement of the horse, but in general the heart  
285 rate samples were of good quality. Heart rate after the interventions decreased fully to the  
286 baseline level, indicating that it was the intervention that caused the rise in heart rate. The data  
287 also indicated that the transportation intervention was more stressful to the horses than the  
288 social isolation intervention. Based on the similarities in these results, the PRI and UNI groups  
289 were regarded as one stress group in the following analysis of facial expressions.

290

291 **Fig 1. Heart rate during interventions.** Boxplots showing the heart rate of (left) privately  
292 owned horses (PRI) and (right) university horses (UNI) during baseline (B), isolation (I), and  
293 transportation (T).

### 294 **Selected EquiFACS codes (HFI method)**

295 Table 1 shows action units selected using the HFI method. All action units that comprised at  
296 least 5% of stress action unit occurrences were more frequent in transportation videos than  
297 baseline videos. Blink action units (AU145 and AU47) and *inner brow raiser* (AU101) had the  
298 most similar rate of occurrence between stress and no-stress states, while *eye white increase*  
299 (AD1), *nostril dilator* (AD38) and *upper lid raising* (AU5) exhibited the largest difference in  
300 frequency between transportation and baseline recordings. The selected action units for social

301 isolation stress mostly showed similar codes. Unlike for the transportation group, *half blink*  
 302 (AU47) was not selected for the social isolation group due to occurring more frequently in no-  
 303 stress videos, and *upper lid raiser* (AU5) is not selected due to low frequency in social isolation  
 304 videos. On the other hand, *ear rotator* (EAD104) was selected during social isolation. “Ear  
 305 flicker” was more frequent and more pronounced in transportation than in social isolation.

306 The selected action units when both groups were combined were used as a larger ‘stress’ group.  
 307 All action units that comprised at least 5% of stress action unit occurrences were also more  
 308 frequent in stress videos than baseline videos. The chosen action units for social isolation were  
 309 identical to those selected for transportation stress, but the percentage difference between no-  
 310 stress and stress frequency counts was noticeably larger for *inner brow raiser* (AU101).

311 **Table 1. Facial expressions during stress (HFI method)**

|                                                    | <i>Eye white increase</i> (AD1) | <i>Nostril dilator</i> (AD38) | <i>Inner brow raiser</i> (AU101) | <i>Blink</i> (AU145) | <i>Half blink</i> (AU47) | <i>Upper lid raiser</i> (AU5) | “Ear flicker” | <i>Ear rotator</i> (EAD104) |
|----------------------------------------------------|---------------------------------|-------------------------------|----------------------------------|----------------------|--------------------------|-------------------------------|---------------|-----------------------------|
| <b>Transportation</b>                              |                                 |                               |                                  |                      |                          |                               |               |                             |
| <b>Percentage of AUs during stress / no stress</b> | 8.2% / 4.8%                     | 13.1% / 8.4%                  | 5.3% / 8.1%                      | 12.7% / 19.6%        | 7.7% / 11.2%             | 8.0% / 5.7%                   | 18.9 / 17.7%  | Not selected                |
| <b>Difference in frequency</b>                     | 113.7%                          | 106.2%                        | 31.4%                            | 30.1%                | 35.8%                    | 98.6%                         | 76.2%         | Not selected                |
| <b>Isolation</b>                                   |                                 |                               |                                  |                      |                          |                               |               |                             |
| <b>Percentage of AUs during stress / no stress</b> | 7.8% / 3.9%                     | 15.0% / 7.0%                  | 15.0% / 12.1%                    | 18.1% / 19.8%        | Not selected             | Not selected                  | 16.6% / 20.2% | 5.3% / 6.2%                 |
| <b>Difference in frequency</b>                     | 85.7%                           | 90.9%                         | 43.0%                            | 12.8%                | Not selected             | Not selected                  | 1.9%          | 6.1%                        |
| <b>Combined</b>                                    |                                 |                               |                                  |                      |                          |                               |               |                             |
| <b>Percentage of AUs during stress / no stress</b> | 8.2% / 4.8%                     | 13.4% / 8.4%                  | 7.2% / 8.1%                      | 13.8% / 19.6%        | 8.0% / 11.2%             | 7.0% / 5.7%                   | 18.4% / 17.7% | Not selected                |

| Difference in frequency | 106.8% | 101.8% | 52.1% | 29.3% | 30.5% | 80.7% | 66.4% | Not selected |
|-------------------------|--------|--------|-------|-------|-------|-------|-------|--------------|
|-------------------------|--------|--------|-------|-------|-------|-------|-------|--------------|

312 Action units (AUs) and action descriptors (ADs) selected using the Human FACS

313 Investigation (HFI) method to represent stress in horses in the transportation and social

314 isolation groups and together as a combined group.

## 315 **Frequency and duration of AUs**

316 Average frequency and maximum duration for selected action units across baseline, social

317 isolation, and transportation videos are shown in Fig 2. Action unit frequency increased across

318 all selected action units, particularly between baseline and transportation stress. However, not

319 all rises were significant.

320

321 **Fig 2. Frequency and duration of EquiFACS codes.** Changes in action unit (AU) and

322 action descriptor (AD) frequency patterns between stress and no-stress states. Stress affected

323 the duration (s) of activity for an AU. Asterisks indicate statistical significance (\* $p < 0.05$ ,

324 \*\* $p < 0.01$ ; \*\*\* $p < 0.001$ ).

325

326 Stress, particularly transportation stress, was correlated with an increase in duration of *upper*

327 *lid raiser* (AU5), *eye white increase* (AU101), *inner brow raiser* (AU 101), and *nostril dilator*

328 (AD38). All action units selected by the HFI method had  $p < 0.01$  for at least one representation

329 and group. Additionally, *tongue show* (AD19) and *lips part* (AU25), related to mouth behavior,

330 showed  $p < 0.01$  across all groups and representations when tested separately. However, each of

331 these action units occurred rarely. *Inner brow raiser* (AU101), despite its high frequency, was

332 only statistically significant when using maximum duration and decreased during transport

333 stress. With just 10 horses in the group, action unit frequency was rarely significant for isolation  
 334 stress.

### 335 **Selected EquiFACS codes (Co-occurrence method)**

336 Action units and action descriptors selected using the Co-occurrence method are presented in  
 337 Table 2. Of the selected codes, *nostril dilator* (AD38), *tongue show* (AD19), *mouth open*  
 338 (AU25), *upper lid raiser* (AU5), *eye white show* (AD1), and “ear flicker” showed significance  
 339 in all OWS. *Inner brow raiser* (AU101) was selected by the HFI method and significant (up to  
 340 a 5-second OWS) using this method.

341 **Table 2. Facial expressions during stress (Co-oc method).**

| <b>O<br/>WS</b> | <b><i>Inner<br/>brow<br/>raiser</i><br/>(AU1<br/>01)</b> | <b><i>Lips<br/>part<br/>show</i><br/>(AU2<br/>5)</b> | <b><i>Tong<br/>ue<br/>show</i><br/>(AD1<br/>9)</b> | <b><i>Nostril<br/>Dilato<br/>r</i><br/>(AD3<br/>8)</b> | <b>“Ear<br/>flicke<br/>r”</b> | <b><i>Blink</i><br/>(AU1<br/>45)</b> | <b><i>Eye<br/>white<br/>increa<br/>se</i><br/>(AD1)</b> | <b><i>Nostril<br/>lift</i><br/>(AUH<br/>13)</b> | <b><i>Upper<br/>lid<br/>raiser</i><br/>(AU5)</b> | <b><i>Half<br/>blink</i><br/>(AU4<br/>7)</b> | <b><i>Ears<br/>forwar<br/>d</i><br/>(EAD<br/>101)</b> | <b><i>Ear<br/>rotator</i><br/>(EAD<br/>104)</b> |
|-----------------|----------------------------------------------------------|------------------------------------------------------|----------------------------------------------------|--------------------------------------------------------|-------------------------------|--------------------------------------|---------------------------------------------------------|-------------------------------------------------|--------------------------------------------------|----------------------------------------------|-------------------------------------------------------|-------------------------------------------------|
| <b>2</b>        | ✓                                                        | ✓                                                    | ✓                                                  | ✓                                                      | ✓                             | ✓                                    | ✓                                                       | ✓                                               | ✓                                                |                                              |                                                       |                                                 |
|                 | (p=0.0<br>42)                                            | (p<0.0<br>01)                                        | (p<0.0<br>01)                                      | (p<0.0<br>01)                                          | (p<0.0<br>01)                 | (p<0.0<br>01)                        | (p<0.0<br>01)                                           | (p=0.0<br>64)                                   | (p<0.0<br>01)                                    |                                              |                                                       |                                                 |
| <b>5</b>        | ✓                                                        | ✓                                                    | ✓                                                  | ✓                                                      | ✓                             | ✓                                    | ✓                                                       | ✓                                               | ✓                                                | ✓                                            |                                                       |                                                 |
|                 | (p=0.0<br>24)                                            | (p<0.0<br>01)                                        | (p<0.0<br>01)                                      | (p<0.0<br>01)                                          | (p<0.0<br>01)                 | (p<0.0<br>01)                        | (p<0.0<br>01)                                           | (p=1.0<br>00)                                   | (p<0.0<br>01)                                    | (p=0.1<br>07)                                |                                                       |                                                 |
| <b>10</b>       | ✓                                                        | ✓                                                    | ✓                                                  | ✓                                                      | ✓                             | ✓                                    | ✓                                                       | ✓                                               | ✓                                                | ✓                                            |                                                       |                                                 |
|                 | (p=0.0<br>51)                                            | (p<0.0<br>01)                                        | (p<0.0<br>01)                                      | (p<0.0<br>01)                                          | (p<0.0<br>01)                 | (p=0.0<br>13)                        | (p<0.0<br>01)                                           | (p=0.4<br>50)                                   | (p<0.0<br>01)                                    | (p=0.1<br>85)                                |                                                       |                                                 |
| <b>15</b>       | ✓                                                        | ✓                                                    | ✓                                                  | ✓                                                      | ✓                             | ✓                                    | ✓                                                       | ✓                                               | ✓                                                | ✓                                            | ✓                                                     |                                                 |



|           |           |           |           |           |           |           |           |           |           |           |           |           |
|-----------|-----------|-----------|-----------|-----------|-----------|-----------|-----------|-----------|-----------|-----------|-----------|-----------|
|           | (p=0.052) | (p<0.001) | (p<0.001) | (p<0.001) | (p<0.001) | (p=0.037) | (p<0.001) | (p=0.576) | (p=0.001) | (p=0.373) | (p=0.173) |           |
| <b>20</b> | ✓         | ✓         | ✓         | ✓         | ✓         | ✓         | ✓         | ✓         | ✓         | ✓         | ✓         |           |
|           | (p=0.090) | (p=0.001) | (p=0.001) | (p<0.001) | (p<0.001) | (p=0.053) | (p<0.001) | (p=0.383) | (p=0.003) | (p=0.238) | (p=0.217) |           |
| <b>30</b> | ✓         | ✓         | ✓         | ✓         | ✓         | ✓         | ✓         | ✓         | ✓         | ✓         | ✓         | ✓         |
|           | (p=0.179) | (p=0.018) | (p=0.017) | (p<0.001) | (p=0.001) | (p=0.079) | (p<0.001) | (p=0.450) | (p=0.018) | (p=0.210) | (p=0.252) | (p=0.641) |

342 Action units (AUs) and action descriptors (ADs) selected using the Co-occurrence method to  
 343 represent stress in horses using different OWS.

### 344 **Leave-One-Out classification**

345 The selected action units in Tables 1 and 2 were used to train a simple LVSM for stress or no-  
 346 stress classification, in order to check the validity of the selected action units. Results of the  
 347 LOO classification are shown in Tables 3 and 4. The best classification was obtained using  
 348 both frequency and maximum duration, reaching an impressive 89% recall rate for the action  
 349 units selected by the HFI method and a 78% precision rate for the action units selected by the  
 350 Co-occurrence method.

351 **Table 3. Results of Leave-One-Out classification for the action units selected by the**  
 352 **Human FACS Investigation (HFI) method**

|                  | <b>Frequency</b> | <b>Max duration</b> | <b>Both</b> |
|------------------|------------------|---------------------|-------------|
| <b>Precision</b> | 73.91%           | 71.43%              | 66.67%      |
| <b>Recall</b>    | 89.47%           | 92.11%              | 89.47%      |
| <b>Accuracy</b>  | 75.76%           | 74.24%              | 68.18%      |

353

354 **Table 4. Results of Leave-One-Out classification for the action units selected by the Co-**  
 355 **occurrence method**

|                  | <b>Frequency</b> | <b>Max duration</b> | <b>Both</b> |
|------------------|------------------|---------------------|-------------|
| <b>Precision</b> | 72.09%           | 58.82%              | 78.38%      |
| <b>Recall</b>    | 81.58%           | 52.63%              | 76.32%      |
| <b>Accuracy</b>  | 71.21%           | 51.52%              | 74.24%      |

356

## 357 **Discussion**

358 The basis for the emotional component of stress was disrupting the horses' regular routines,  
359 by either keeping them in while their herd mate was brought outside or by loading them onto  
360 a trailer for transportation. However, it is possible that a number of external inputs inevitably  
361 associated with transportation, e.g., exposure to new environment, wind, confined space,  
362 social isolation, or movement restriction, induced additional stress. Social isolation, on the  
363 other hand, was associated with few external inputs, because the horses stayed in their  
364 familiar environment during the intervention. In the social isolation group, a significant rise  
365 in heart rate was observed, although to a lower level than during transportation. It was  
366 concluded that both interventions induced emotional stress in horses, according to the rise in  
367 heart rate [19,21,30,35,36] recorded under well-controlled circumstances.

368

369 Analysis of the EquiFACS codes showed increased frequency of several specific action units  
370 and action descriptors during both interventions (Fig 3). According to the HFI method, the  
371 action units of a stressed horse included *upper lid raiser* (AU5) and *inner brow raiser*  
372 (AU101), as well as *blink* (AU145) and "ear flicker". The frequency of the action descriptors  
373 *nostril dilator* (AD38) and *eye white increase* (AD1), not describing certain muscle-induced  
374 codes but rather the effects of other muscle movement, was also significantly increased.  
375 According to the Co-occurrence method, *tongue show* (AD19) and *mouth open* (AU25) were  
376 also important. When comparing the HFI method with the Co-occurrence method for 2-

377 second OWS, these two codes were the only differences. Since HFI is a frequency-based  
378 method, less frequent action units such as *tongue show* (AD19) were not picked up as  
379 significant using the HFI method but were still sufficiently distinct to differentiate between  
380 stress and no-stress states. The logical interpretation of this pattern is that *tongue show*  
381 (AD19) and *lips part* (AU25) are sufficiently distinct to discriminate between stress and  
382 neutral states, but absence of the codes cannot exclude stress.

383

384 **Fig 3. Illustration of facial expressions during stress.** Action units (AU)/action descriptors  
385 (AD) relevant for recognizing a stressed horse (II). A “neutral” horse (I) is included for  
386 reference. A: *Upper lid raiser* (AU5). B: *Nostril dilator* (AD38). C: *Inner brow raiser*  
387 (AU101). D: “Ear flicker”. E: *Eye white increase* (AD1). F: *Tongue show* (AD19). Action  
388 codes are compared to a “neutral” horse (above). Illustration by Anders Rådén/ARDI.

389

390 Most of the codes described by EquiFACS fit well with earlier literature on the subject, e.g.,  
391 flared nostrils, repetitive mouth behaviors, increased eye white, and an increase in eye  
392 movements are features described previously during stress in horses [23,24,30]. However,  
393 *inner brow raiser* (AU101) is generally associated with pain and was not expected to be  
394 displayed during emotional stress where pain was not present. It is therefore relevant to discuss  
395 the presence of other emotional states during the interventions.

396

397 Because animals are not able to self-report, biological interpretation of the state of the horses  
398 remains open and therefore the meaning of the occurrence of action units remains pragmatic.  
399 For example, there is no 100% certainty that the horses are free of pain, since there is no “gold

400 standard” for evaluating pain. However, by only recruiting horses perceived as healthy and free  
401 from pain, and by using the horses as their own control, the risk of presence of pain can be  
402 lowered, although not completely eliminated. Given this limitation, the overall impressive  
403 recall and precision rates of the LOO classification indicate that the action units/action  
404 descriptors selected by both the HFI method and the Co-occurrence method can be used  
405 successfully to determine whether a horse is stressed or not, on the basis of video-recordings.  
406 This is supported by the fact that the methods picked almost identical action units/action  
407 descriptors for emotional stress.

### 408 **Action descriptors**

409 Since the horse is a flight animal, increased awareness of the surroundings during threats is of  
410 great importance to its preservation behaviors. *Dilation of the nostril* (AD38), an effect of  
411 several muscles contracting to increase the lumen of the nostril, helps facilitate air intake during  
412 flight, meaning that this action descriptor could have a pure physiological purpose, rather than  
413 displaying emotion.

414

415 The action units *upper lid raiser* (AU5) and *eye white increase* (AD1) increase the field of  
416 vision, with the latter being translated mainly into an increase in eye- or head movements.  
417 Increased visibility of sclera could also be a result of increased head movements due to  
418 restlessness, or of several action units exerting their effects on the eye, e.g., *upper lid raiser*  
419 (AU5) or contraction of the infraorbital muscles of the eye, the latter not coded in EquiFACS.  
420 This is consistent with earlier findings that a horse under stress tends to focus on the  
421 environment and the stressors, causing an increase in head and eye movement [29]. If *eye white*  
422 *increase* (AD1) is present at the same time as *upper lid raiser* (AU5), this could indicate an

423 eye white increase due to raising of the upper eyelid. Otherwise, an increase in *eye white*  
424 *increase* (AD1) could be due to several other factors.

425

426 A distinct increase in the movement “ear flicker” was apparent in both transportation and social  
427 isolation stress. Ear movements are very communicative [37] and often noted by laymen when  
428 describing horse emotions. Movement of the horse’s ears could also aid sound perception, but  
429 that effect has been less well studied. During transportation, ear movements due to sound are a  
430 likely cause of high “ear flicker” frequency, since the horse’s ear does not linger in any one  
431 position for long. During social isolation, a likely cause is increased awareness of the  
432 surroundings. The location of the ear conveys information about the horse’s emotional state [6]  
433 and is used in many of the grimace scales for pain assessment [10,11]. Only one ear code, *ear*  
434 *rotator* (EAD104), was selected in our dataset, indicating that “ears backward” may be present  
435 more often in stressed horses. An increase in “ear flicker” could also prove a good indicator of  
436 emotional stress.

### 437 **Action units of the upper face**

438 Interesting differences were seen in the action units of the upper face when the two stress  
439 induction methods were compared. The reason for *upper lid raiser* (AU5) being more  
440 prominently seen during transportation stress, but not selected when analyzing isolation stress,  
441 could be that transportation stress is influenced by multiple external factors. In theory, a tension  
442 in *m. levator palpebrae superioris* (proposed basis for AU5) would be a plausible mechanism  
443 to hide tension in *m. levator anguli oculi medialis* (proposed basis for AU101). This means  
444 that it is uncertain whether *inner brow raiser* (AU101) would have been seen more often during  
445 transportation if not for the presence of *upper lid raiser* (AU5), due to increased environmental  
446 factors or increased intensity of stress. These results suggest that external factors or stress

447 intensity may play a major role in hiding certain facial expressions, meaning that caution is  
448 needed in interpretation when the horse is exposed to strong stimuli from the environment (e.g.,  
449 sounds, smells, visuals).

450

451 The frequency of *blink* (AU145) increased during both transportation and social isolation. An  
452 earlier study also reported an increase in blinks during stressful situations [16]. However,  
453 Merckies et al. [17] found instead that full blink diminished during stress. In this study, the  
454 increase was only statistically significant for the Co-occurrence method during transportation  
455 stress. This may be a result of the greater number of horses in the transportation stress group.  
456 Differences in frequency of full blinks were not significant between baseline and stress (Fig 2).  
457 Since duration of full blink is by definition restrained to less than half a second, it is unlikely  
458 that maximum duration would have any meaning, even if it showed a significant increase. Blink  
459 frequency needs to be studied further in order to draw firm conclusions regarding its role as a  
460 marker of stress, and special consideration needs to be given to the induction method.

### 461 **Action units of the lower face**

462 The only action unit selected as indicative of stress for the lower face was *lips part* (AU25).  
463 Concurrently, increased frequency of *tongue show* (AD19) was noted. This coincides well with  
464 earlier findings on behaviors of the tongue and repetitive mouth and licking behaviors during  
465 stress [29,35]. These codes were only selected by the Co-occurrence method, but there was an  
466 increase in frequency and maximum duration for the codes when tested specifically in the HFI  
467 method. As discussed earlier, this might be a result of the codes being less frequent, but highly  
468 distinct for stress. *Tongue show* (AD19) and *lips part* (AU25) are similarly interrelated, since  
469 *tongue show* (AD19) requires the horse's mouth to be open. Tongue "twisting" has previously  
470 been described as a stereotypic behavior [38]. *Tongue show* (AD19) may be interpreted as a

471 coping mechanism in horses subjected to stress. Oral stereotypies are often reported as a long-  
472 term consequence of inability of horses to perform natural behavior, creating chronic stress  
473 presenting as oral stereotypies (e.g., cribbing). It is therefore not surprising that *tongue show*  
474 (AD19) was less significant during the social isolation stress test, since this intervention is a  
475 rather acute form of stress. It is interesting that such coping behaviors were recorded during  
476 the transportation stress test, given the relatively short duration of acute stress. Since the  
477 increase in heart rate was greater during transportation, the presence of *tongue show* (AD19)  
478 might also be a result of higher stress intensity during transportation.

### 479 **Signs of stress in pain scales**

480 The specificity of facial expressions across emotional states is of interest for their use as an  
481 emotional indicator. To our knowledge, pain is the only emotion to be analyzed to date using  
482 EquiFACS and, since pain and stress are intimately connected, comparison of the facial  
483 expressions of pain and stress is needed. Rashid *et al.* [27] found that *nostril dilator* (AD38)  
484 and *chin raiser* (AU17) were indicative of pain when using both the HFI and Co-occurrence  
485 methods. The fact that *nostril dilator* (AD38) is also present during stress may be interpreted  
486 in several ways, e.g., it may indicate that pain to some degree also induces emotional stress or  
487 that occurrence of this action descriptor is common for either type of intervention. During both  
488 stress and pain, respiratory rate of the horse tends to increase, which may be a reason for *nostril*  
489 *dilator* (AD38) being common during both interventions.

490

491 Interestingly, some face-based pain scoring tools include facial expressions that were selected  
492 here as indicative of emotional pain-free stress. For example, the horse grimace scale [10]  
493 includes *ear flattener* (EAD103) and *ear rotator* (EAD104) as elements of the pain scale, while  
494 the FAP scale [12] uses eye white increase as an element. The “equine pain face” shows the

495 features “tension of the lower face, rotated ears, dilated nostril and tension above the eye” [11].  
496 All but “tension of the lower face” could be seen in the stressed horses. Furthermore, *upper*  
497 *eyelid raiser* (AU5) could mask presence of “tension above the eye” (here interpreted as  
498 AU101) in the “pain face”. Some facial expressions linked to stress can also be found in  
499 ethograms based on facial expressions of ridden horses [39], where “exposure of sclera”,  
500 “mouth opening and shutting repeatedly”, “ears rotated back or flat”, and “tongue exposed” are  
501 present. However, comparison of expressions in ridden and unriden horses require caution,  
502 since tack [40] or observers [41] might influence the facial expressions present.

503

504 It is highly possible that a horse experiencing pain simultaneously experiences some degree of  
505 emotional or physiological stress. When discussing both physiological and behavioral aspects  
506 of pain assessment, stress is often described as a complicating factor [13], and use of facial  
507 expressions for pain scoring is presented as a “better” approach. Based on our results, the level  
508 of stress to which a horse is exposed should be considered during interpretation of facial  
509 expressions for pain evaluation. For example in ridden horses, where pain is usually not  
510 expected to be present, the predictive values of pain scales may decrease because the level of  
511 stress is increased in competition or rider-conflict situations [40], resulting in a stress response  
512 being interpreted as pain if the above-mentioned action units are present. This would have  
513 consequences for the way in which these horses are treated. A horse experiencing pain is in  
514 need of veterinary treatment, while a horse experiencing stress needs the help of behavior  
515 specialist or trainer to reduce its emotional stress. EquiFACS coding may be used for further  
516 validation of the construct validity of current horse emotion (including pain) assessment tools  
517 based on facial expressions [1].



## 518 **Using video and EquiFACS to record facial expressions**

519 While obtaining useful footage proved relatively simple, the coding of action units and action  
520 descriptors was very time-consuming, with each 30-second sequence taking approximately one  
521 hour to annotate manually. In total, all clips took 300 hours of annotation. Based on the good  
522 rater agreement, one coding of each sequence appears sufficient.

523

524 It is not possible to perform a complete EquiFACS annotation during direct observation, e.g.,  
525 under clinical conditions. Some easily observable EquiFACS-based measures, such as  
526 *increased eye white* (AD1), increased blink rate, and mouth behaviors, should be investigated  
527 for their performance value in “grimace”-based scales for discovering stress or no-stress in  
528 both undisturbed horses and “disturbed” horses, e.g., ridden horses. As mentioned earlier, many  
529 facial features may be affected by external stimuli which may have nothing to do with the  
530 emotion of the horse. Therefore, if scorings are not performed directly, we recommend that the  
531 analysis be performed on video-recordings, where onset and offset of a certain grimace can be  
532 verified, increasing the specificity of that facial action. Still images may capture a short  
533 moment where the horse is reacting to other stimuli, such as a noise, that is not detectable from  
534 the image. Techniques for automatic detection of action units in humans generally rely on video  
535 footage [42]. It has also been shown that, for horses in pain, the chance of picking up all  
536 essential action units/descriptors on a random still frame is very low [27]. The same is likely  
537 true for emotional stress. If live scorings are used to assess pain, the horse’s emotional state  
538 and possible external factors need to be considered when interpreting the results. Many action  
539 units are also very difficult to score live, without the use of slow-motion or frame-by-frame in  
540 video.

541

542 The data presented here provide a foundation for development of automated surveillance of  
543 animals based on video-recordings or live video, to determine facial expressions during stress  
544 using EquiFACS. However, there were difficulties with the use of both the surveillance  
545 cameras and the automated video selection tool. The freely moving stressed horses changed  
546 position rapidly, decreasing the length of the optimal observation windows. The automated  
547 face detection method used for random and unbiased selection of video clips for annotation  
548 tended to prioritize the longest clips, meaning that the clips might have been systematically  
549 selected from quiet periods, i.e., from periods where the horse was least stressed. This could  
550 be a contributing factor to the lower stress level observed during social isolation than during  
551 transportation, and to some action codes not being significant. There were also fewer horses in  
552 the social isolation group. The main limitations with this study were the small number of horses  
553 and the inability to blind the transportation videos. We sought to overcome this problem by  
554 using three annotators for the transportation clips.

## 555 **Conclusions**

556 It proved possible to induce and monitor the presence of emotional stress objectively in horses  
557 under field conditions, using simple equipment and ordinary management practices. Applying  
558 two different frequency and duration-based methods revealed that two types of short-term  
559 emotional stress (social isolation, transportation) induced several facial actions. Overall, it was  
560 concluded that the facial traits *eye white increase* (AD1), *nostril dilator* (AD38), *inner brow*  
561 *raiser* (AU101), *upper lid raiser* (AU5), “ear flicker”, and *tongue show* (AD19) were  
562 indicative of equine stress. This confirmed earlier findings of behavioral aspects during stress  
563 and some features in equine pain scales. Data from this study can be used to construct less  
564 time-consuming observation tools for use when fast scoring is needed (e.g., in an equine  
565 hospital environment). Scoring using the EquiFACS system proved to work well using video

566 footage, showing that it can be performed using video surveillance to minimize observer  
567 influence and errors during scoring.

## 568 **Acknowledgements**

569 DVM Camilla Frisk and DVM Alina Silventoinen are thanked for annotating the films.

570 Horses and owners who participated in this study are warmly thanked for their contributions.

## 571 **References**

- 572 1. Descovich KA, Wathan J, Leach MC, Buchanan-Smith HM, Flecknell P, Farningham  
573 D, et al. Facial expression: An under-utilized tool for the assessment of welfare in  
574 mammals. *ALTEX*. 2017;34: 409–429. doi:10.14573/altex.1607161
- 575 2. Cooke N. A. Facial Mimicry versus Perspective-taking: Decoding Instructional Sets as  
576 Empathy-inducing Strategies. M.Sc. Thesis. Appalachian State University. 2015.  
577 Available from: <https://libres.uncg.edu/ir/asu/listing.aspx?id=18771>
- 578 3. Diogo R, Wood BA, Aziz MA, Burrows A. On the origin, homologies and evolution  
579 of primate facial muscles, with a particular focus on hominoids and a suggested  
580 unifying nomenclature for the facial muscles of the Mammalia. *J Anat*. 2009;215: 300–  
581 319. doi:10.1111/j.1469-7580.2009.01111.x
- 582 4. Williams AC. Facial expression of pain: An evolutionary account. *Behav Brain Sci*.  
583 2002;25: 439–455. doi:10.1017/S0140525X02000080
- 584 5. Ekman P, Friesen W V, Ancoli S. Facial signs of emotional experience. *J Pers Soc*  
585 *Psychol*. 1980;39: 1125–1134. doi:10.1037/h0077722

- 586 6. Wathan J, Burrows AM, Waller BM, McComb K. EquiFACS: The equine facial action  
587 coding system. *PLoS One*. 2015;10: 1–35. doi:10.1371/journal.pone.0131738
- 588 7. Ekman P, Friesen W V., Hager JC. *Facial Action Coding System Investigator’s Guide*.  
589 Psychologist. Salt Lake City, USA: Research Nexus; 2002.
- 590 8. Vick SJ, Waller BM, Parr LA, Pasqualini MCS, Bard KA. A cross-species comparison  
591 of facial morphology and movement in humans and chimpanzees using the Facial  
592 Action Coding System (FACS). *J Nonverbal Behav*. 2007;31: 1–20.  
593 doi:10.1007/s10919-006-0017-z
- 594 9. Waller BM, Peirce K, Caeiro CC, Scheider L, Burrows AM, McCune S, et al.  
595 Paedomorphic Facial Expressions Give Dogs a Selective Advantage. *PLoS One*.  
596 2013;8: 1–6. doi:10.1371/journal.pone.0082686
- 597 10. Dalla Costa E, Minero M, Lebelt D, Stucke D, Canali E, Leach MC. Development of  
598 the Horse Grimace Scale (HGS) as a pain assessment tool in horses undergoing routine  
599 castration. *PLoS One*. 2014;9: 1–10. doi:10.1371/journal.pone.0092281
- 600 11. Glerup KB, Forkman B, Lindegaard C, Andersen PH. An equine pain face. *Vet*  
601 *Anaesth Analg*. 2015;42: 103–114. doi:10.1111/vaa.12212
- 602 12. van Loon JPAM, Van Dierendonck MC. Monitoring acute equine visceral pain with  
603 the Equine Utrecht University Scale for Composite Pain Assessment (EQUUS-  
604 COMPASS) and the Equine Utrecht University Scale for Facial Assessment of Pain  
605 (EQUUS-FAP): A scale-construction study. *Vet J*. 2015.  
606 doi:10.1016/j.tvjl.2015.08.023
- 607 13. McLennan KM, Miller AL, Dalla Costa E, Stucke D, Corke MJ, Broom DM, et al.  
608 Conceptual and methodological issues relating to pain assessment in mammals: The

- 609 development and utilisation of pain facial expression scales. *Appl Anim Behav Sci*.  
610 2019;217: 1–15. doi:10.1016/j.applanim.2019.06.001
- 611 14. Mayo LM, Heilig M. In the face of stress: Interpreting individual differences in stress-  
612 induced facial expressions. *Neurobiol Stress*. 2019;10: 100166.  
613 doi:10.1016/J.YNSTR.2019.100166
- 614 15. Hintze S, Smith S, Patt A, Bachmann I, Würbel H. Are eyes a mirror of the soul? What  
615 eye wrinkles reveal about a horse's emotional state. *PLoS One*. 2016;11: 1–15.  
616 doi:10.1371/journal.pone.0164017
- 617 16. Roberts K, Hemmings AJ, Moore-Colyer M, Parker MO, McBride SD. Neural  
618 modulators of temperament: A multivariate approach to personality trait identification  
619 in the horse. *Physiol Behav*. 2016;167: 125–131. doi:10.1016/j.physbeh.2016.08.029
- 620 17. Merkies K, Ready C, Farkas L, Hodder A. Eye Blink Rates and Eyelid Twitches as a  
621 Non-Invasive Measure of Stress in the Domestic Horse. *Anim an open access J from*  
622 *MDPI*. 2019;9: 562. doi:10.3390/ani9080562
- 623 18. Budzyńska M. Stress reactivity and coping in horse adaptation to environment. *J*  
624 *Equine Vet Sci*. 2014;34: 935–941. doi:10.1016/j.jevs.2014.05.010
- 625 19. Schmidt. Cortisol release, heart rate, and heart rate variability in transport-naive horses  
626 during repeated road transport. *Domest Anim Endocrinol*. 2010;39: 205–213.  
627 doi:10.1016/J.DOMANIEND.2010.06.002
- 628 20. Mal ME, Friend TH, Lay DC, Vogelsang SG, Jenkins OC. Behavioral responses of  
629 mares to short-term confinement and social isolation 1. 1991;31: 13–24.  
630 doi:10.1016/0168-1591(91)90149-R

- 631 21. Buchanan KL. Stress and the evolution of condition-dependent signals. *Trends Ecol*  
632 *Evol.* 2000;15: 156–160. doi:10.1016/S0169-5347(99)01812-1
- 633 22. Butler RK, Finn DP. Stress-induced analgesia. *Progress in Neurobiology.* 2009. pp.  
634 184–202. doi:10.1016/j.pneurobio.2009.04.003
- 635 23. Jennings EM, Okine BN, Roche M, Finn DP. Stress-induced hyperalgesia. *Prog*  
636 *Neurobiol.* 2014;121: 1–18. doi:10.1016/j.pneurobio.2014.06.003
- 637 24. Zolovick A, Upson DW, Eleftheriou BE. Diurnal Variation in Plasma  
638 Glucocorticosteroid Levels in the Horse (*Equus Caballus*). *J Endocrinol.* 1966;35:  
639 249–253. doi:10.1677/joe.0.0350249
- 640 25. Rietmann TR, Stauffacher M, Bernasconi P, Auer JA, Weishaupt MA. The association  
641 between heart rate, heart rate variability, endocrine and behavioural pain measures in  
642 horses suffering from laminitis. *J Vet Med Ser A Physiol Pathol Clin Med.* 2004;51:  
643 218–225. doi:10.1111/j.1439-0442.2004.00627.x
- 644 26. Hörnicke H, Engelhardt W v., Ehrlein HJ. Effect of exercise on systemic blood  
645 pressure and heart rate in horses. *Pflügers Arch Eur J Physiol.* 1977;372: 95–99.  
646 doi:10.1007/BF00582212
- 647 27. Rashid M, Silventoinen A, Glerup KB, Andersen PH. Equine Facial Action Coding  
648 System for determination of pain-related facial responses in videos of horses. *PLoS*  
649 *One.* 2020; Forthcoming
- 650 28. Kunz M, Meixner D, Lautenbacher S. Facial muscle movements encoding pain - A  
651 systematic review. *Pain.* 2019;160: 535–549. doi:10.1097/j.pain.0000000000001424
- 652 29. Young T, Creighton E, Smith T, Hosie C. A novel scale of behavioural indicators of

- 653 stress for use with domestic horses. *Appl Anim Behav Sci.* 2012;140: 33–43.  
654 doi:10.1016/j.applanim.2012.05.008
- 655 30. Tateo A, Padalino B, Boccaccio M, Maggiolino A, Centoducati P. Transport stress in  
656 horses: Effects of two different distances. *J Vet Behav Clin Appl Res.* 2012;7: 33–42.  
657 doi:10.1016/j.jveb.2011.04.007
- 658 31. Rietmann TR, Stuart AEA, Bernasconi P, Stauffacher M, Auer JA, Weishaupt MA.  
659 Assessment of mental stress in warmblood horses: Heart rate variability in comparison  
660 to heart rate and selected behavioural parameters. *Appl Anim Behav Sci.* 2004.  
661 doi:10.1016/j.applanim.2004.02.016
- 662 32. Rashid M, Broome S, Andersen PH, Glerup KB, Lee YJ. What should I annotate? An  
663 automatic tool for finding video segments for EquiFACS annotation. In: A.J. Spink,  
664 editor. *Measuring Behaviour.* Manchester; 2018. pp. 6–8.
- 665 33. ELAN (Version 5.4). Nijmegen: Max Planck Institute for Psycholinguistics; Available:  
666 <https://tla.mpi.nl/tools/tla-tools/elan/>
- 667 34. Varoquaux G, Buitinck L, Louppe G, Grisel O, Pedregosa F, Mueller A. Scikit-learn:  
668 Machine Learning in Python. *GetMobile Mob Comput Commun.* 2015;19: 29–33.  
669 doi:10.1145/2786984.2786995
- 670 35. Munsters CCBM, de Gooijer J-W, van den Broek J, van Oldruitenborgh-Oosterbaan  
671 MMS. Heart rate, heart rate variability and behaviour of horses during air transport.  
672 *Vet Rec.* 2013;172: 15–15. doi:10.1136/vr.100952
- 673 36. Yngvesson J, de Boussard E, Larsson M, Lundberg A. Loading horses (*Equus*  
674 *caballus*) onto trailers—Behaviour of horses and horse owners during loading and  
675 habituating. *Appl Anim Behav Sci.* 2016;184: 59–65.

- 676 doi:10.1016/j.applanim.2016.08.008
- 677 37. Wathan J, McComb K. The eyes and ears are visual indicators of attention in domestic  
678 horses. *Curr Biol*. 2014;24: R677–R679. doi:10.1016/j.cub.2014.06.023
- 679 38. Fureix C, Gorecka-Bruzda A, Gautier E, Hausberger M. Cooccurrence of Yawning  
680 and Stereotypic Behaviour in Horses ( *Equus caballus* ) . *ISRN Zool*. 2011: 1–10.  
681 doi:10.5402/2011/271209
- 682 39. Dyson S, Berger J, Ellis AD, Mullard J. Development of an ethogram for a pain  
683 scoring system in ridden horses and its application to determine the presence of  
684 musculoskeletal pain. *J Vet Behav Clin Appl Res*. 2018.  
685 doi:10.1016/j.jveb.2017.10.008
- 686 40. Glerup KB, Andersen PH, Wathan J. What information might be in the facial  
687 expressions of ridden horses? Adaptation of behavioral research methodologies in a  
688 new field. *Journal of Veterinary Behavior: Clinical Applications and Research*. 2018.  
689 doi:10.1016/j.jveb.2017.12.002
- 690 41. Torcivia C, McDonnell S. In-Person Caretaker Visits Disrupt Ongoing Discomfort  
691 Behavior in Hospitalized Equine Orthopedic Surgical Patients. *Animals*. 2020;10.  
692 doi:10.3390/ani10020210
- 693 42. Littlewort G, Bartlett MS, Fasel I, Susskind J, Movellan J. Dynamics of facial  
694 expression extracted automatically from video. *Image Vis Comput*. 2006;24: 615–625.  
695 doi:10.1016/j.imavis.2005.09.011



## 696 **Supporting information captions**

697 **S1 Dataset. Data used for the data analysis**

698 **S2 File. HRM files (compressed R-R intervals for heart rate analysis)**

699 **S3 Video. Sample clip of a baseline video**

700 **S4 Video. Sample clip of an isolation video**

701 **S5 Video. Sample clip of a transportation video**

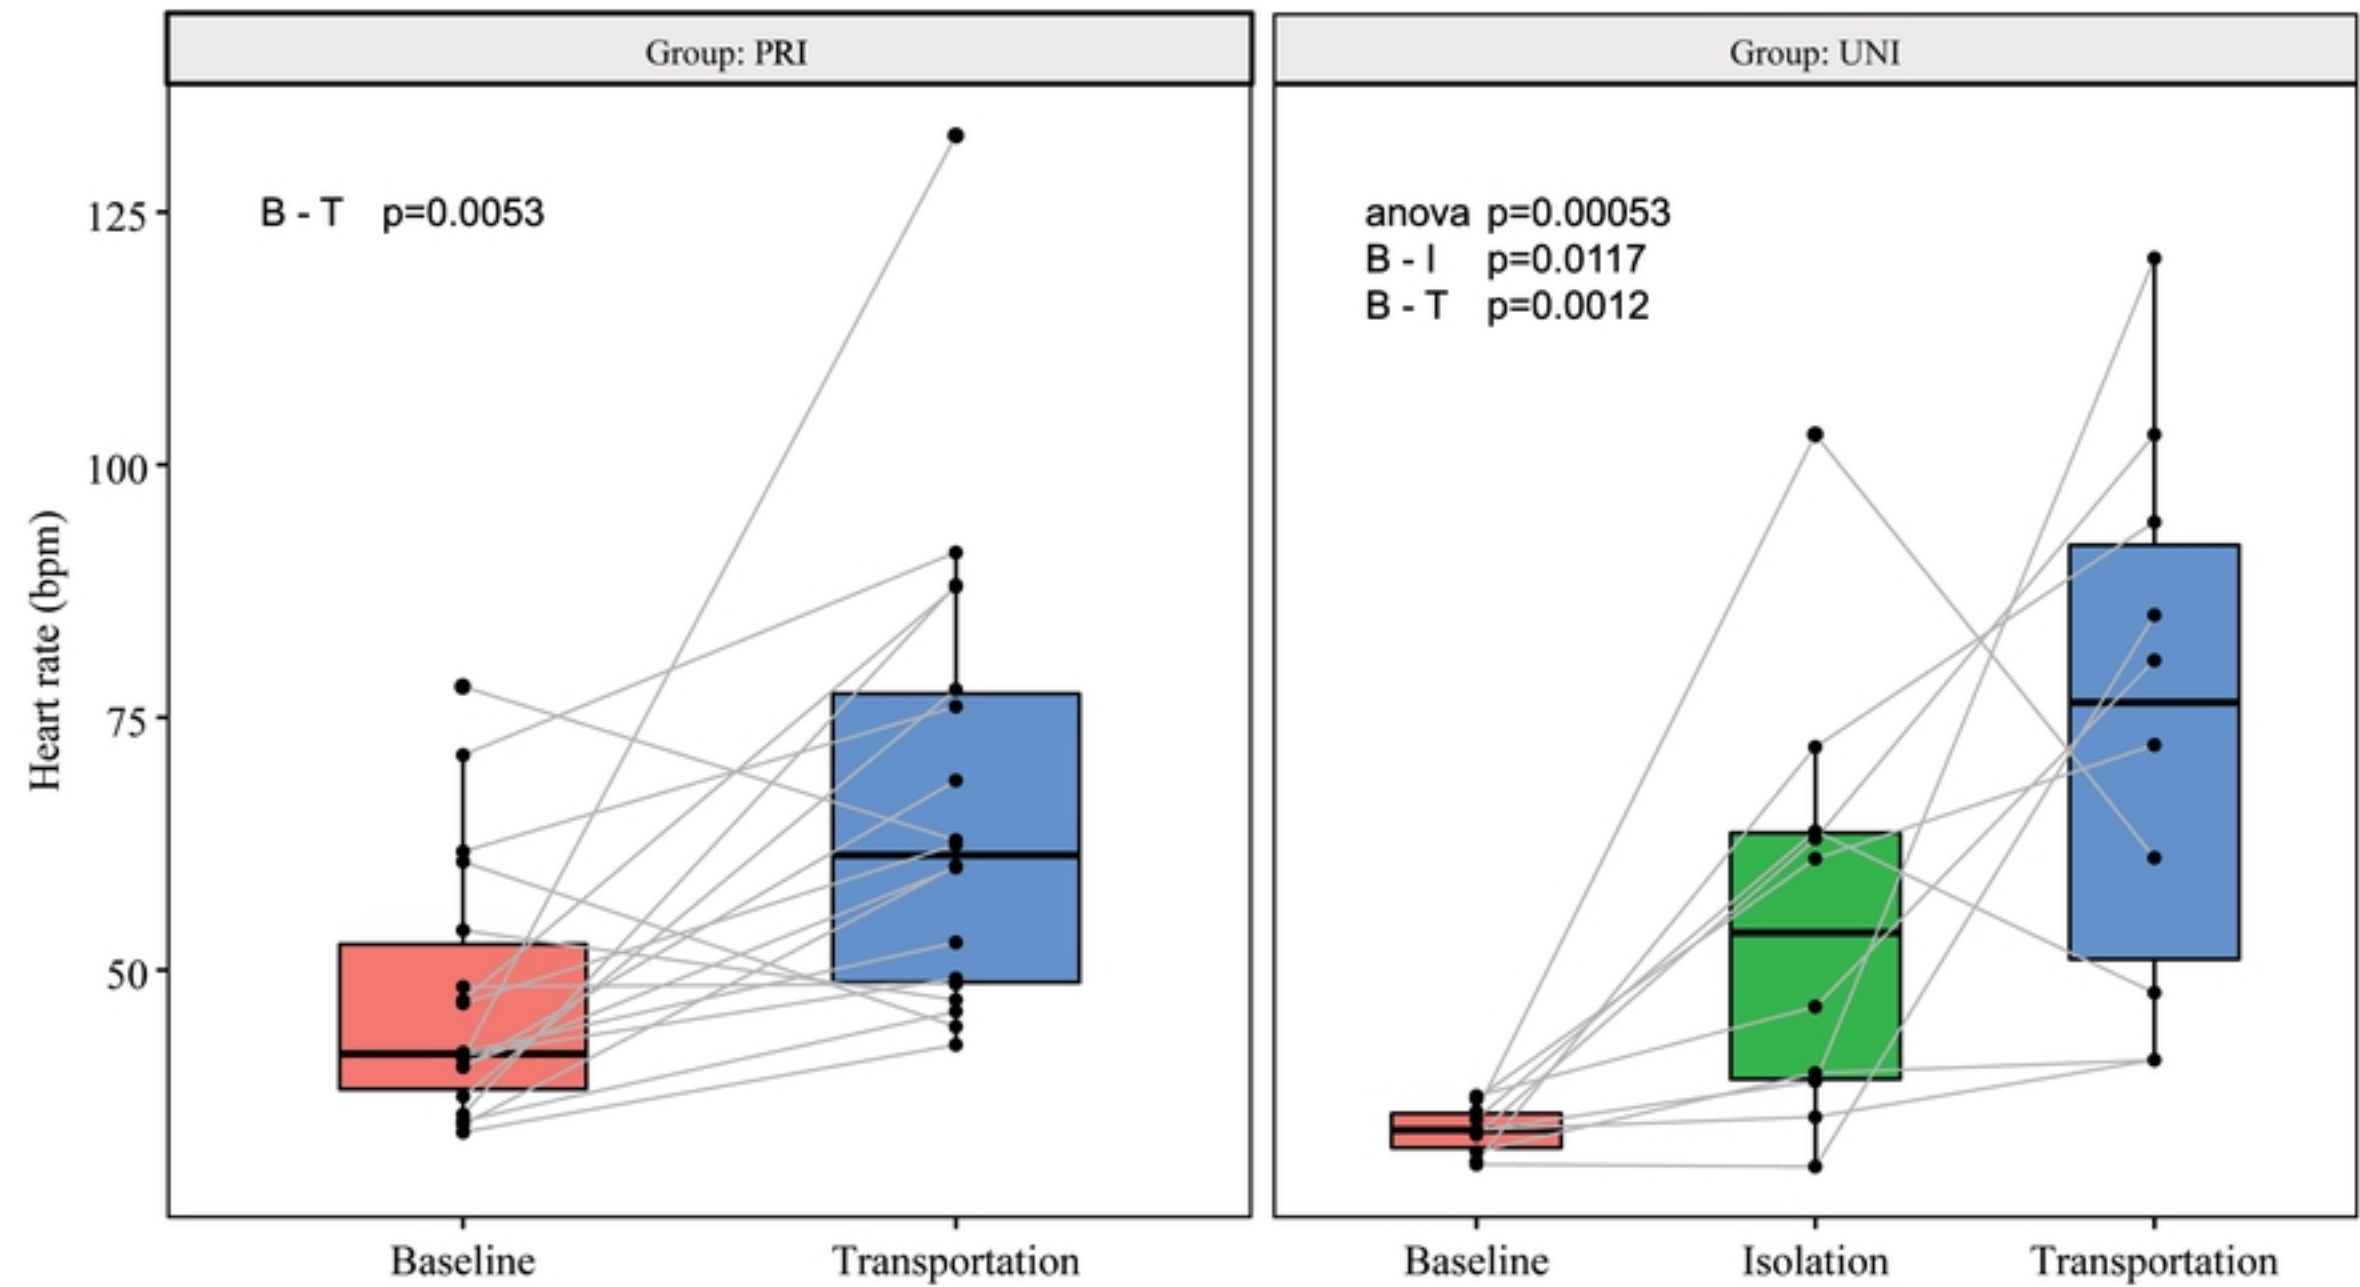

Fig 1

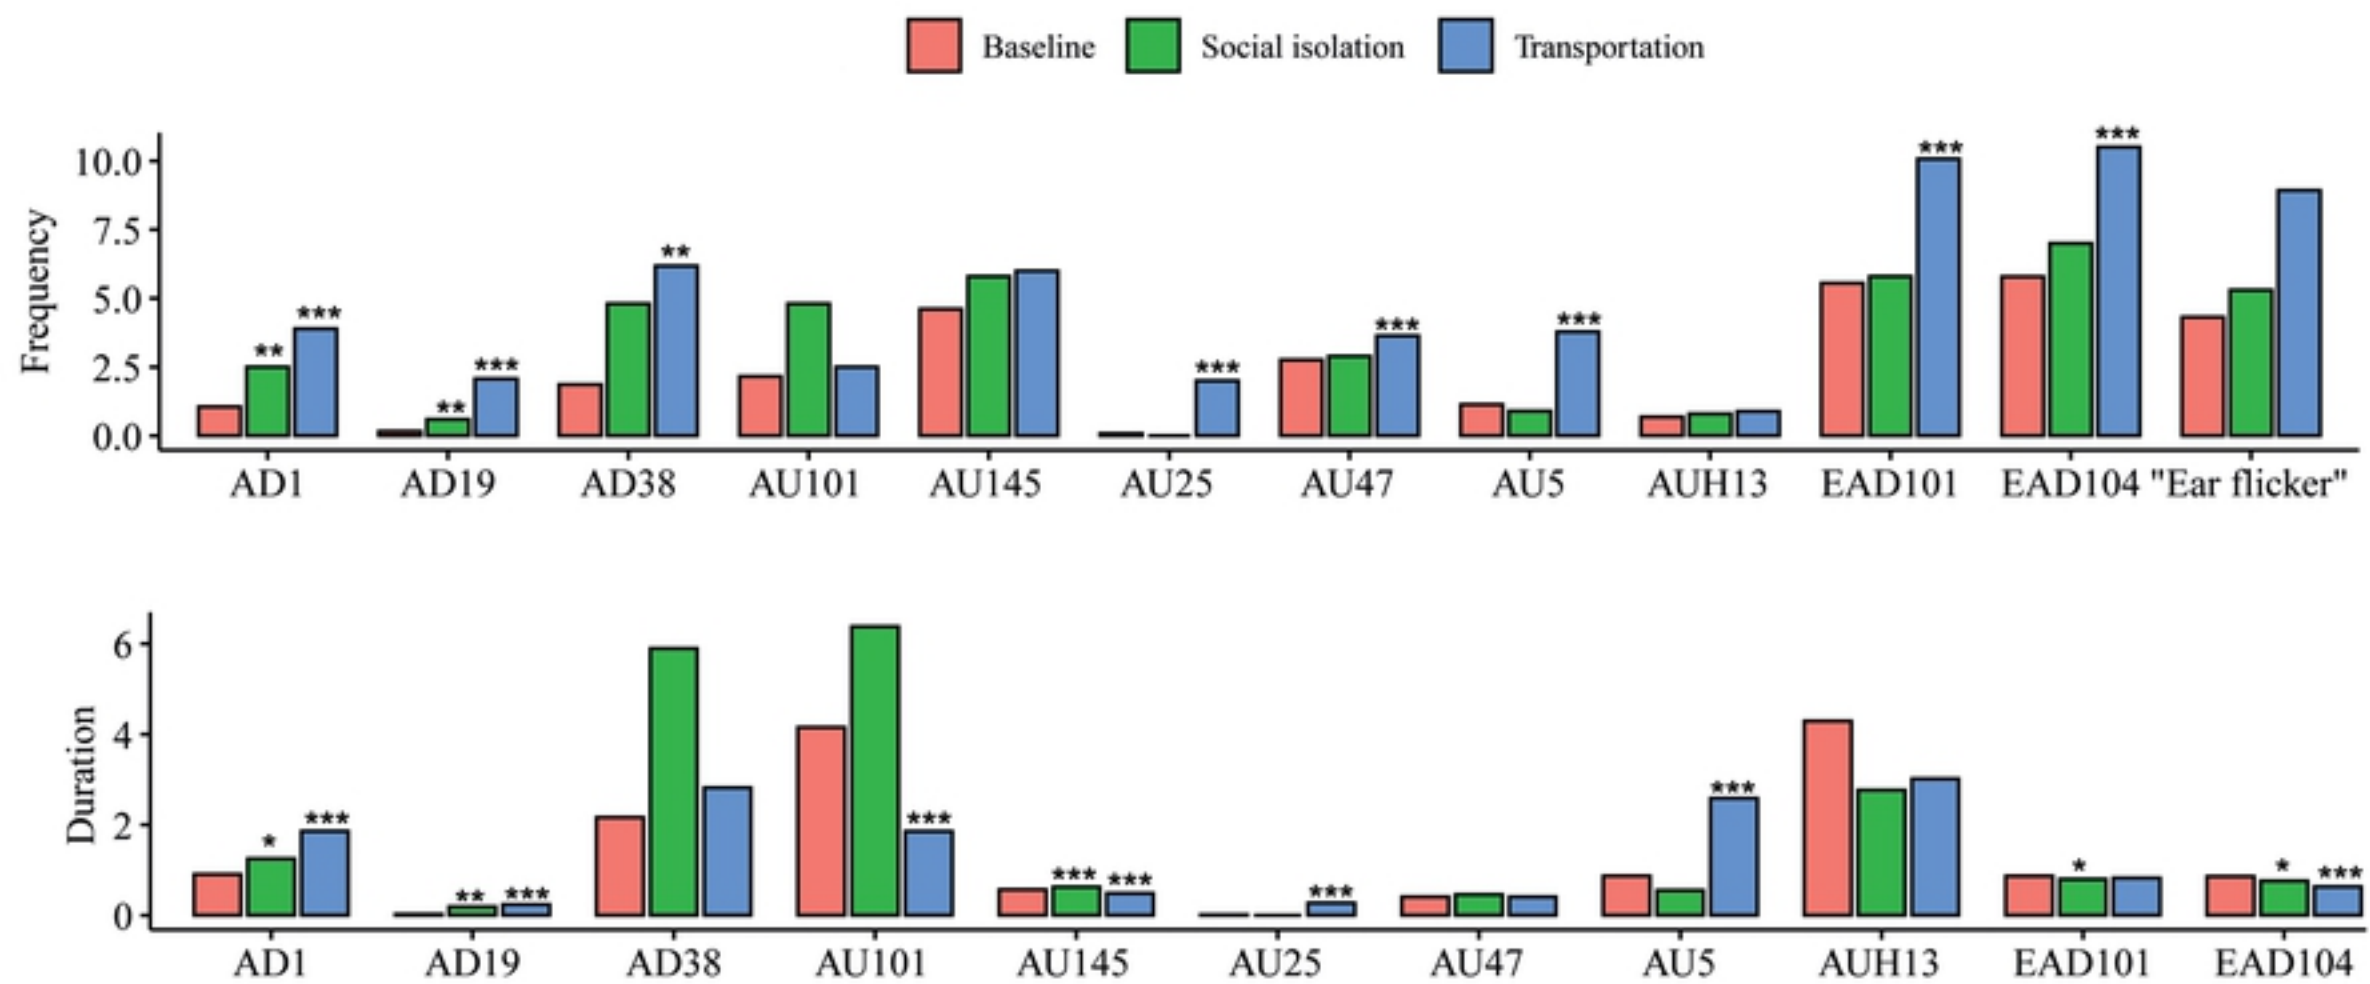

Fig 2

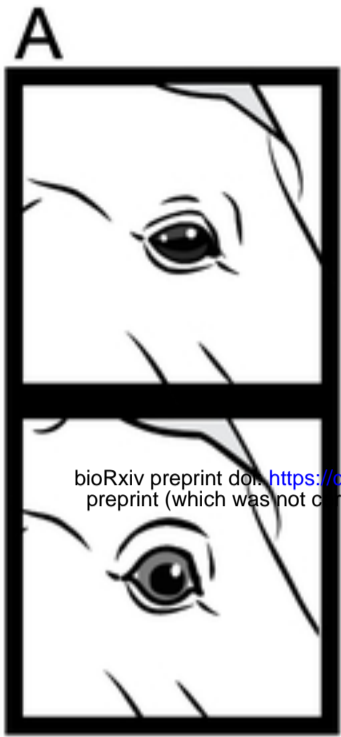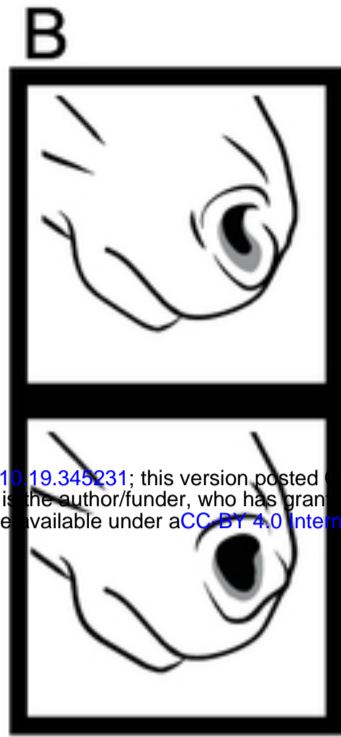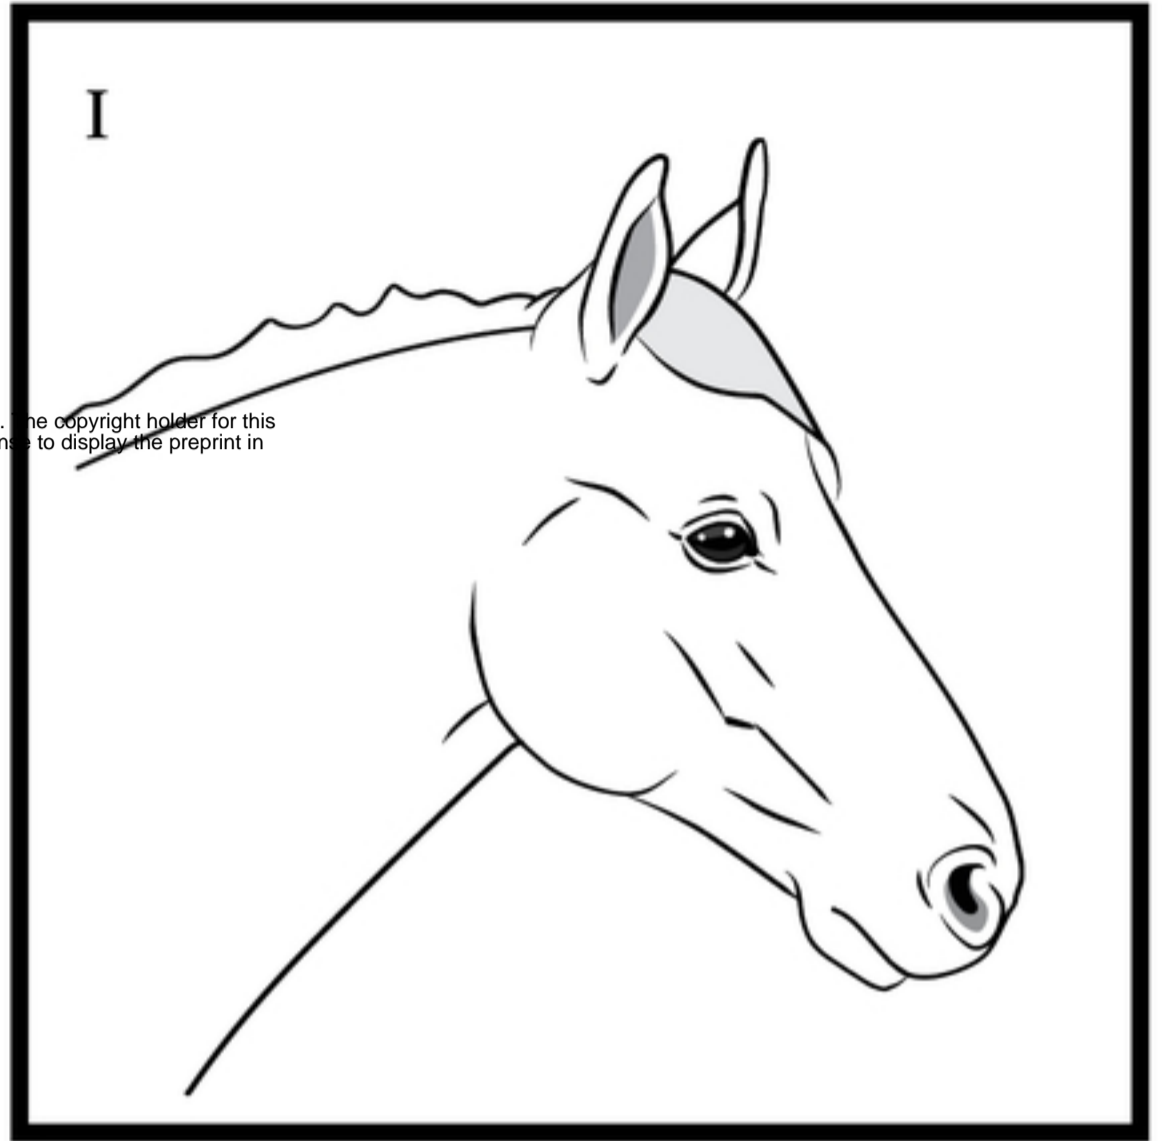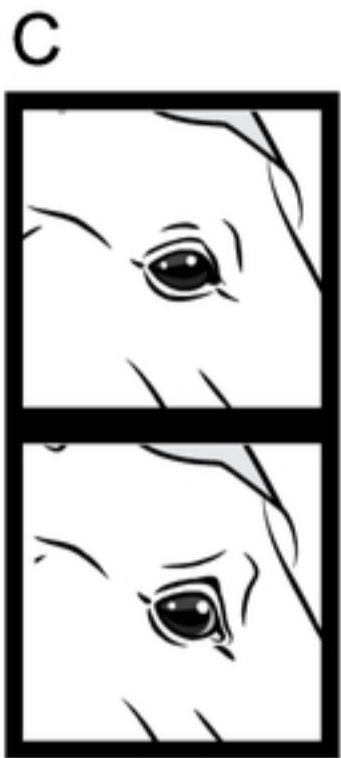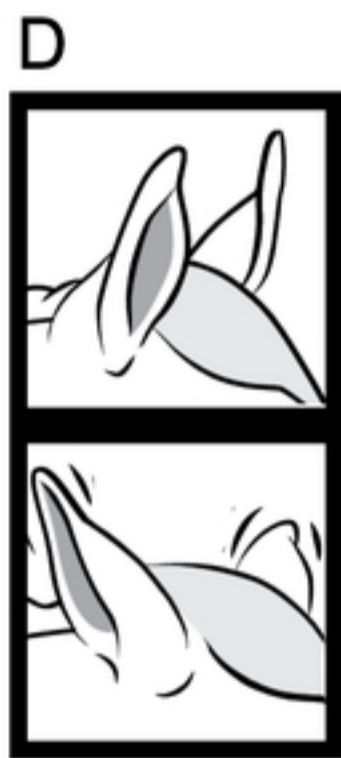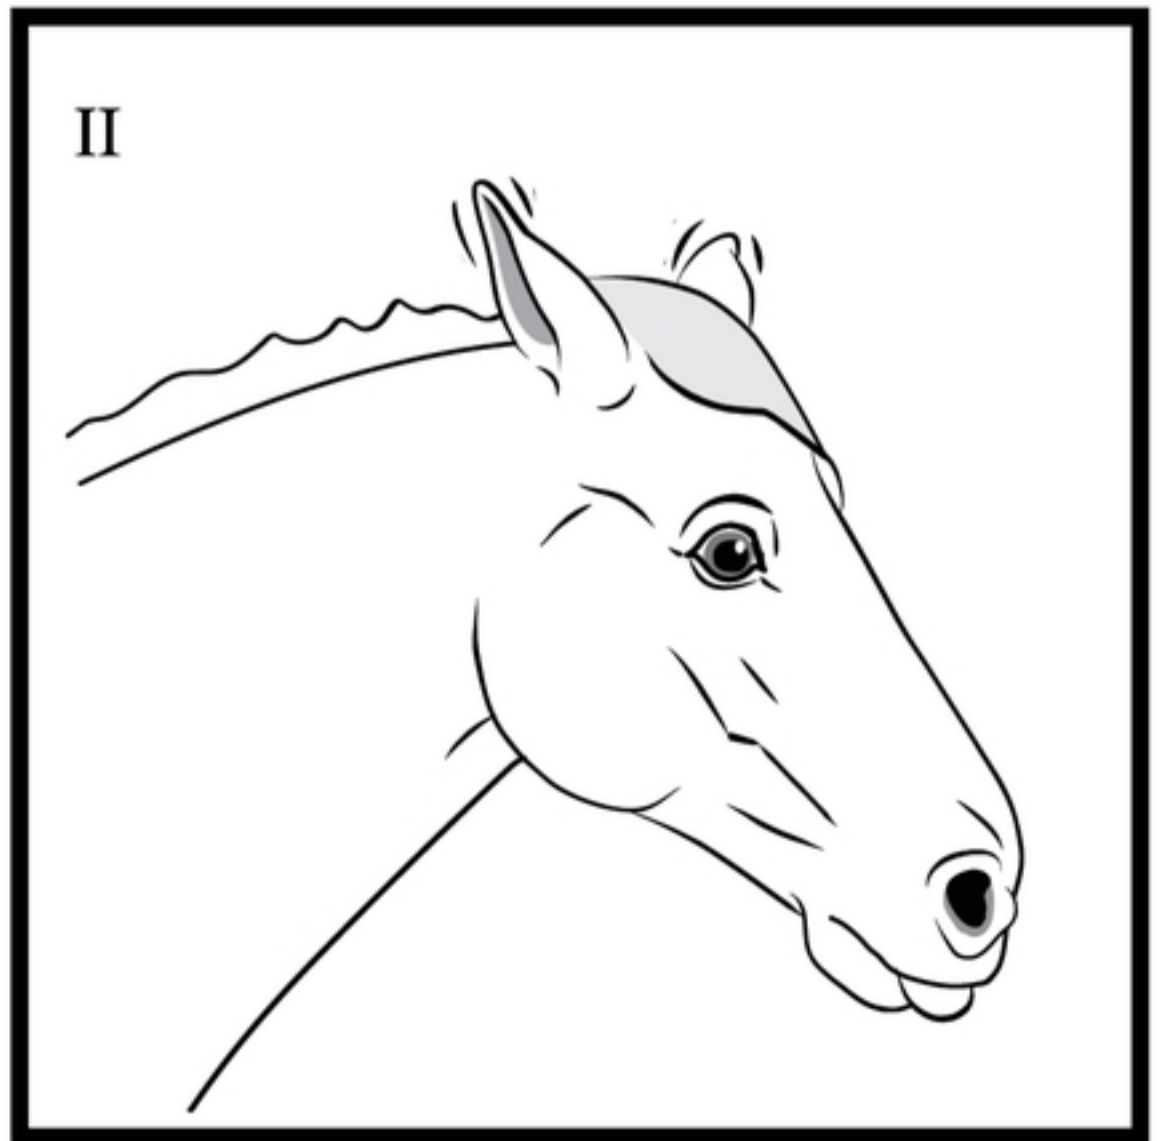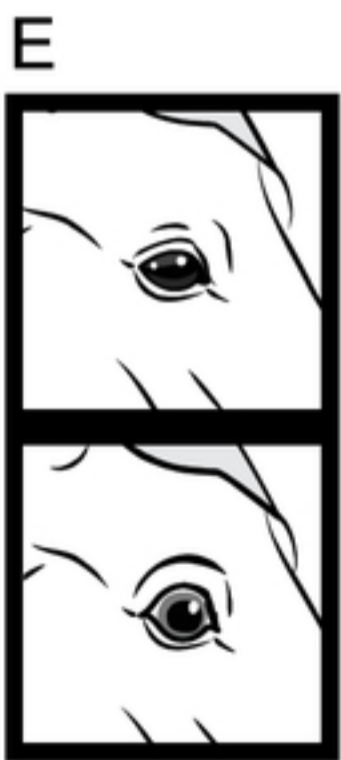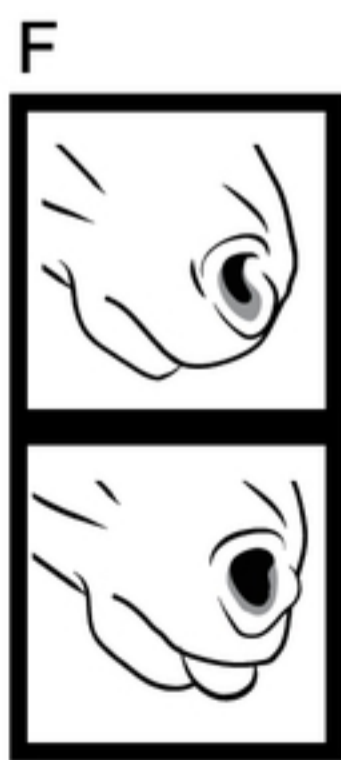

bioRxiv preprint doi: <https://doi.org/10.1101/2020.10.19.345231>; this version posted October 19, 2020. The copyright holder for this preprint (which was not certified by peer review) is the author/funder, who has granted bioRxiv a license to display the preprint in perpetuity. It is made available under aCC-BY 4.0 International license.

Fig 3
